# Supplementary material
Source: MDPI journal article supplement (https://www.mdpi.com/1424-2818/15/6/715)
Supplement: s1 [file s1 › diversity-2315507-supplementary.pdf]

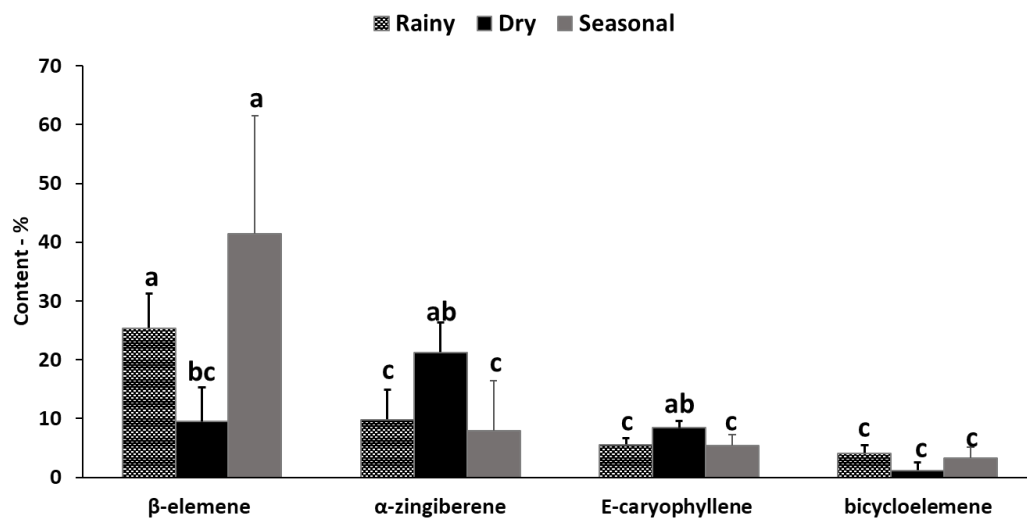

**Figure S3.** Variations in the Percentage of Major Components in the Essential Oils from *Piper lhotzkyanum* Kunth Leaves.

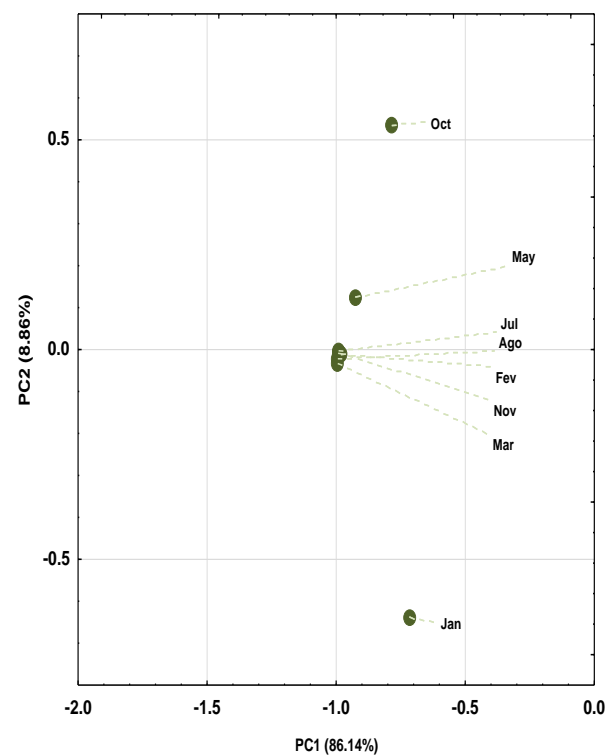

**Figure S4.** Biplot (Principal Component Analysis—PCA) Resulting from the Analysis of the Essential Oils Obtained from leaves of *Piper lhotzkyanum* Kunth (Piperaceae) Collected for the Seasonality Study.
